# Supplementary material for: Multiple Organ Dysfunction Interactions in Critically Ill Children
Source: PubMed Central journal article supplement (PMC9081807; doi:10.3389/fped.2022.874282), 2022-04-25
Supplement: Data_Sheet_1.pdf [file Data_Sheet_1.pdf]

## *Supplementary Material*

**Supplementary Table 1. Presence of organ dysfunction and severity of dysfunction\* for survivors and non-survivors by 28 days.**

| <b>Organ Dysfunction Incidence by Day 28<br/>(n, %)</b> | <b><u>All Patients</u><br/>(n=7897)</b> | <b><u>Survivors</u><br/>(n=7431)</b> | <b><u>Non-survivors</u><br/>(n=466)</b> |
|---------------------------------------------------------|-----------------------------------------|--------------------------------------|-----------------------------------------|
| <b>Endocrinologic</b>                                   | 5143 (65.1%)                            | 4730 (62.4%)                         | 413 (88.6%)                             |
| <b>Cardiovascular</b>                                   | 4384 (55.5%)                            | 3957 (53.2%)                         | 427 (91.6%)                             |
| <b>Severe Cardiovascular</b>                            | 881 (11.2%)                             | 617 (8.3%)                           | 264 (56.7%)                             |
| <b>Immunologic</b>                                      | 4184 (53.0%)                            | 3901 (52.5%)                         | 283 (60.7%)                             |
| <b>Neurologic</b>                                       | 4156 (52.6%)                            | 3742 (50.4%)                         | 414 (88.8%)                             |
| <b>Respiratory</b>                                      | 3555 (45.0%)                            | 3158 (42.5%)                         | 397 (85.2%)                             |
| <b>Severe Respiratory</b>                               | 1009 (12.8%)                            | 750 (10.1%)                          | 259 (55.6%)                             |
| <b>Hematologic</b>                                      | 3204 (40.6%)                            | 2879 (38.7%)                         | 325 (69.7%)                             |
| <b>Severe Hematologic</b>                               | 351 (4.4%)                              | 304 (4.1%)                           | 47 (10.1%)                              |
| <b>Renal</b>                                            | 2898 (36.7%)                            | 2620 (35.3%)                         | 278 (59.7%)                             |
| <b>Coagulation</b>                                      | 994 (12.6%)                             | 835 (11.2%)                          | 159 (34.1%)                             |
| <b>Liver</b>                                            | 623 (7.9%)                              | 437 (5.9%)                           | 186 (39.9%)                             |

\*Severity grading based on PODIUM criteria is only available for cardiovascular, respiratory, and hematologic dysfunction

**Supplementary Table 2. Association between two organ dysfunction interactions and mortality or persistent MOD.**

| <b><u>Combinations of<br/>two Organ<br/>Dysfunctions</u></b> | <b><u>Total (n, %)</u></b> | <b><u>Died<br/>(n=466)</u></b> | <b><u>p-value</u></b> | <b><u>Persistent MOD<br/>(n=1002)</u></b> | <b><u>p-value</u></b> |
|--------------------------------------------------------------|----------------------------|--------------------------------|-----------------------|-------------------------------------------|-----------------------|
| <b>Coag+CV</b>                                               | 518 (6.6%)                 | 107 (20.7%)                    | 0.26                  | 166 (16.6%)                               | 0.13                  |
| <b>Coag+Endo</b>                                             | 597 (7.6%)                 | 107 (17.9%)                    | 0.27                  | 200 (20.0%)                               | 0.15                  |
| <b>Coag+Immuno</b>                                           | 553 (7.0%)                 | 81 (14.6%)                     | 0.34                  | 191 (19.1%)                               | 0.86                  |
| <b>Coag+Neuro</b>                                            | 370 (4.7%)                 | 88 (23.8%)                     | 0.99                  | 145 (14.5%)                               | 0.89                  |
| <b>Coag+Renal</b>                                            | 354 (4.5%)                 | 70 (19.8%)                     | 0.91                  | 137 (13.7%)                               | 0.06                  |
| <b>Coag+Resp</b>                                             | 379 (4.8%)                 | 102 (26.9%)                    | 0.02                  | 160 (16.0%)                               | 0.89                  |
| <b>CV+Endo</b>                                               | 2603 (33.0%)               | 329 (12.6%)                    | <0.001*               | 476 (47.5%)                               | <0.001*               |
| <b>CV+Heme</b>                                               | 1419 (18.0%)               | 237 (16.7%)                    | 0.02                  | 397 (39.6%)                               | 0.86                  |
| <b>CV+Immuno</b>                                             | 1728 (21.9%)               | 202 (11.7%)                    | 0.51                  | 382 (38.1%)                               | 0.54                  |
| <b>CV+Liver</b>                                              | 432 (5.5%)                 | 155 (35.9%)                    | 0.001*                | 140 (14.0%)                               | 0.02                  |
| <b>CV+Neuro</b>                                              | 2154 (27.3%)               | 323 (15.0%)                    | <0.001*               | 472 (47.1%)                               | <0.001*               |
| <b>CV+Renal</b>                                              | 1240 (15.7%)               | 202 (16.3%)                    | <0.001*               | 268 (26.7%)                               | 0.14                  |
| <b>CV+Resp</b>                                               | 2007 (25.4%)               | 316 (15.7%)                    | <0.001*               | 480 (47.9%)                               | <0.001*               |
| <b>Endo+Heme</b>                                             | 1683 (21.3%)               | 232 (13.8%)                    | 0.06                  | 466 (46.5%)                               | 0.003*                |
| <b>Endo+Immuno</b>                                           | 2399 (30.4%)               | 212 (8.8%)                     | 0.98                  | 469 (46.8%)                               | 0.12                  |
| <b>Endo+Liver</b>                                            | 491 (6.2%)                 | 149 (30.3%)                    | 0.50                  | 164 (16.4%)                               | 0.79                  |
| <b>Endo+Neuro</b>                                            | 2258 (28.6%)               | 310 (13.7%)                    | <0.001*               | 480 (47.9%)                               | <0.001*               |
| <b>Endo+Renal</b>                                            | 1642 (20.8%)               | 200 (12.2%)                    | 0.05                  | 321 (32.0%)                               | 0.10                  |
| <b>Endo+Resp</b>                                             | 2001 (25.3%)               | 307 (15.3%)                    | <0.001*               | 484 (48.3%)                               | <0.001*               |
| <b>Heme+Immuno</b>                                           | 1833 (23.2%)               | 188 (10.3%)                    | 0.56                  | 492 (49.1%)                               | 0.007                 |
| <b>Heme+Liver</b>                                            | 433 (5.5%)                 | 131 (30.3%)                    | 0.31                  | 161 (16.1%)                               | 0.28                  |
| <b>Heme+Neuro</b>                                            | 1164 (14.7%)               | 211 (18.1%)                    | 0.30                  | 349 (34.8%)                               | <0.001*               |
| <b>Heme+Renal</b>                                            | 964 (12.2%)                | 169 (17.5%)                    | <0.001*               | 295 (29.4%)                               | 0.03                  |
| <b>Heme+Resp</b>                                             | 1060 (13.4%)               | 224 (21.1%)                    | <0.001*               | 360 (35.9%)                               | <0.001*               |
| <b>Immuno+Liver</b>                                          | 329 (4.2%)                 | 83 (25.2%)                     | <0.001*               | 126 (12.6%)                               | 0.58                  |
| <b>Immuno+Neuro</b>                                          | 1522 (19.3%)               | 189 (12.4%)                    | 0.68                  | 355 (35.4%)                               | <0.001*               |
| <b>Immuno+Renal</b>                                          | 1165 (14.8%)               | 132 (11.3%)                    | 0.18                  | 303 (30.2%)                               | <0.001*               |
| <b>Immuno+Resp</b>                                           | 1376 (17.4%)               | 200 (14.5%)                    | 0.02                  | 359 (35.8%)                               | <0.001*               |
| <b>Liver+Neuro</b>                                           | 439 (5.6%)                 | 150 (34.2%)                    | 0.02                  | 147 (14.7%)                               | 0.03                  |
| <b>Liver+Renal</b>                                           | 323 (4.1%)                 | 113 (35.0%)                    | 0.09                  | 118 (11.8%)                               | 0.92                  |

|                    |              |             |         |             |         |
|--------------------|--------------|-------------|---------|-------------|---------|
| <b>Liver+Resp</b>  | 387 (4.9%)   | 145 (37.5%) | 0.06    | 148 (14.8%) | 0.64    |
| <b>Neuro+Renal</b> | 1119 (14.2%) | 189 (16.9%) | <0.001* | 273 (27.2%) | 0.03    |
| <b>Neuro+Resp</b>  | 2296 (29.1%) | 303 (13.2%) | 0.81    | 557 (55.6%) | <0.001* |
| <b>Renal+Resp</b>  | 946 (12.0%)  | 193 (20.4%) | <0.001* | 267 (26.6%) | 0.09    |

\*p<0.005 considered statistically significant.

*Coag*: coagulation

*CV*: cardiovascular

*Endo*: endocrinologic

*Immuno*: immunologic

*Heme*: hematologic

*Neuro*: neurologic

*Resp*: respiratory

**Supplementary Table 3. Association between three organ dysfunction interactions and mortality or persistent MOD.**

| <b><u>Combined Organ Dysfunctions</u></b> | <b><u>All Patients (n=7897)</u></b> | <b><u>Died (n=466)</u></b> | <b><u>p-value</u></b> | <b><u>Persistent MOD (n=1002)</u></b> | <b><u>p-value</u></b> |
|-------------------------------------------|-------------------------------------|----------------------------|-----------------------|---------------------------------------|-----------------------|
| <b>Coag+CV+Endo</b>                       | 420 (5.3%)                          | 100 (23.8%)                | 0.72                  | 146 (14.6%)                           | 0.67                  |
| <b>Coag+CV+Immuno</b>                     | 356 (4.5%)                          | 70 (19.7%)                 | 0.11                  | 127 (12.7%)                           | 0.30                  |
| <b>Coag+CV+Neuro</b>                      | 294 (3.7%)                          | 86 (29.3%)                 | 0.72                  | 119 (11.9%)                           | 0.17                  |
| <b>Coag+CV+Renal</b>                      | 250 (3.2%)                          | 64 (25.6%)                 | 0.14                  | 98 (9.8%)                             | 0.44                  |
| <b>Coag+CV+Resp</b>                       | 312 (4.0%)                          | 95 (30.4%)                 | 0.41                  | 132 (13.2%)                           | 0.34                  |
| <b>Coag+Endo+Immuno</b>                   | 422 (5.3%)                          | 73 (17.3%)                 | 0.68                  | 158 (15.8%)                           | 0.70                  |
| <b>Coag+Endo+Neuro</b>                    | 322 (4.1%)                          | 84 (26.1%)                 | 0.27                  | 128 (12.8%)                           | 0.003*                |
| <b>Coag+Endo+Renal</b>                    | 288 (3.6%)                          | 65 (22.6%)                 | 0.64                  | 115 (11.5%)                           | 0.12                  |
| <b>Coag+Endo+Resp</b>                     | 327 (4.1%)                          | 96 (29.4%)                 | 0.93                  | 141 (14.1%)                           | 0.04                  |
| <b>Coag+Immuno+Neuro</b>                  | 247 (3.1%)                          | 57 (23.1%)                 | 0.23                  | 110 (11.0%)                           | 0.04                  |
| <b>Coag+Immuno+Renal</b>                  | 249 (3.2%)                          | 49 (19.7%)                 | 0.74                  | 108 (10.8%)                           | 0.05                  |
| <b>Coag+Immuno+Resp</b>                   | 264 (3.3%)                          | 69 (26.1%)                 | 0.22                  | 118 (11.8%)                           | 0.89                  |
| <b>Coag+Neuro+Renal</b>                   | 198 (2.5%)                          | 54 (27.3%)                 | 0.02                  | 94 (9.4%)                             | 0.53                  |
| <b>Coag+Neuro+Resp</b>                    | 292 (3.7%)                          | 85 (29.1%)                 | 0.40                  | 130 (13.0%)                           | 0.004*                |
| <b>Coag+Renal+Resp</b>                    | 211 (2.7%)                          | 63 (29.9%)                 | 0.05                  | 97 (9.7%)                             | 0.14                  |
| <b>CV+Endo+Heme</b>                       | 1026 (13.0%)                        | 213 (20.8%)                | 0.18                  | 322 (32.1%)                           | 0.73                  |
| <b>CV+Endo+Immuno</b>                     | 1217 (15.4%)                        | 179 (14.7%)                | 0.71                  | 311 (31.0%)                           | 0.27                  |
| <b>CV+Endo+Liver</b>                      | 387 (4.9%)                          | 146 (37.7%)                | 0.93                  | 130 (13.0%)                           | 0.54                  |
| <b>CV+Endo+Neuro</b>                      | 1488 (18.8%)                        | 289 (19.4%)                | 0.61                  | 374 (37.3%)                           | 0.03                  |
| <b>CV+Endo+Renal</b>                      | 912 (11.5%)                         | 183 (20.1%)                | 0.59                  | 221 (22.1%)                           | 0.49                  |
| <b>CV+Endo+Resp</b>                       | 1414 (17.9%)                        | 285 (20.2%)                | 0.14                  | 377 (37.6%)                           | <0.001*               |
| <b>CV+Heme+Immuno</b>                     | 890 (11.3%)                         | 152 (17.1%)                | 0.24                  | 279 (27.8%)                           | <0.001*               |
| <b>CV+Heme+Liver</b>                      | 336 (4.3%)                          | 127 (37.8%)                | 0.96                  | 122 (12.2%)                           | 0.52                  |
| <b>CV+Heme+Neuro</b>                      | 816 (10.3%)                         | 201 (24.6%)                | 0.35                  | 275 (27.4%)                           | 0.29                  |
| <b>CV+Heme+Renal</b>                      | 573 (7.3%)                          | 156 (27.2%)                | 0.04                  | 183 (18.3%)                           | <0.001*               |
| <b>CV+Heme+Resp</b>                       | 795 (10.1%)                         | 206 (25.9%)                | 0.79                  | 288 (28.7%)                           | 0.63                  |
| <b>CV+Immuno+Liver</b>                    | 249 (3.2%)                          | 80 (32.1%)                 | 0.43                  | 96 (9.6%)                             | 0.63                  |
| <b>CV+Immuno+Neuro</b>                    | 897 (11.4%)                         | 167 (18.6%)                | 0.28                  | 266 (26.5%)                           | 0.86                  |
| <b>CV+Immuno+Renal</b>                    | 562 (7.1%)                          | 113 (20.1%)                | 0.78                  | 180 (18.0%)                           | 0.01                  |
| <b>CV+Immuno+Resp</b>                     | 879 (11.1%)                         | 172 (19.6%)                | 0.60                  | 274 (27.3%)                           | 0.77                  |
| <b>CV+Liver+Neuro</b>                     | 369 (4.7%)                          | 148 (40.1%)                | 0.61                  | 121 (12.1%)                           | 0.01                  |
| <b>CV+Liver+Renal</b>                     | 273 (3.5%)                          | 112 (41.0%)                | 0.51                  | 96 (9.6%)                             | 0.30                  |

|                           |              |             |        |             |         |
|---------------------------|--------------|-------------|--------|-------------|---------|
| <b>CV+Liver+Resp</b>      | 341 (4.3%)   | 142 (41.6%) | 0.41   | 122 (12.2%) | 0.001*  |
| <b>CV+Neuro+Renal</b>     | 728 (9.2%)   | 176 (24.2%) | 0.37   | 218 (21.8%) | 0.24    |
| <b>CV+Neuro+Resp</b>      | 1469 (18.6%) | 283 (19.3%) | 0.02   | 428 (42.7%) | 0.77    |
| <b>CV+Renal+Resp</b>      | 679 (8.6%)   | 178 (26.2%) | 0.76   | 215 (21.5%) | 1.0     |
| <b>Endo+Heme+Immuno</b>   | 1073 (13.6%) | 152 (14.2%) | 0.39   | 352 (35.1%) | 0.79    |
| <b>Endo+Heme+Liver</b>    | 381 (4.8%)   | 124 (32.5%) | 0.48   | 144 (14.4%) | 0.65    |
| <b>Endo+Heme+Neuro</b>    | 864 (10.9%)  | 188 (21.8%) | 0.01   | 289 (28.8%) | 0.43    |
| <b>Endo+Heme+Renal</b>    | 693 (8.8%)   | 153 (22.1%) | 0.05   | 234 (23.4%) | 0.69    |
| <b>Endo+Heme+Resp</b>     | 806 (10.2%)  | 198 (24.6%) | 0.21   | 296 (29.5%) | 0.18    |
| <b>Endo+Immuno+Liver</b>  | 295 (3.7%)   | 79 (26.8%)  | 0.90   | 116 (11.6%) | 0.50    |
| <b>Endo+Immuno+Neuro</b>  | 1048 (13.3%) | 164 (15.6%) | 0.003* | 290 (28.9%) | 0.93    |
| <b>Endo+Immuno+Renal</b>  | 813 (10.3%)  | 118 (14.5%) | 0.23   | 233 (23.3%) | 0.32    |
| <b>Endo+Immuno+Resp</b>   | 995 (12.6%)  | 171 (17.2%) | 0.002* | 289 (28.8%) | 0.02    |
| <b>Endo+Liver+Neuro</b>   | 395 (5.0%)   | 141 (35.7%) | 0.23   | 132 (13.2%) | 0.009   |
| <b>Endo+Liver+Renal</b>   | 294 (3.7%)   | 106 (36.1%) | 0.23   | 109 (10.9%) | 0.91    |
| <b>Endo+Liver+Resp</b>    | 355 (4.5%)   | 138 (38.9%) | 0.77   | 133 (13.3%) | 0.003*  |
| <b>Endo+Neuro+Renal</b>   | 755 (9.6%)   | 170 (22.5%) | 0.87   | 216 (21.6%) | 0.09    |
| <b>Endo+Neuro+Resp</b>    | 1474 (18.7%) | 274 (18.6%) | 0.03   | 422 (42.1%) | 0.005   |
| <b>Endo+Renal+Resp</b>    | 695 (8.8%)   | 174 (25.0%) | 0.97   | 215 (21.5%) | 0.009   |
| <b>Heme+Immuno+Liver</b>  | 281 (3.6%)   | 75 (26.7%)  | 0.42   | 115 (11.5%) | 0.29    |
| <b>Heme+Immuno+Neuro</b>  | 659 (8.3%)   | 135 (20.5%) | 0.89   | 234 (23.4%) | 0.88    |
| <b>Heme+Immuno+Renal</b>  | 605 (7.7%)   | 112 (18.5%) | 0.38   | 230 (23.0%) | 0.17    |
| <b>Heme+Immuno+Resp</b>   | 619 (7.8%)   | 146 (23.6%) | 0.30   | 239 (23.9%) | 0.13    |
| <b>Heme+Liver+Neuro</b>   | 347 (4.4%)   | 124 (35.7%) | 0.91   | 127 (12.7%) | 0.73    |
| <b>Heme+Liver+Renal</b>   | 268 (3.4%)   | 101 (37.7%) | 0.52   | 102 (10.2%) | 0.003*  |
| <b>Heme+Liver+Resp</b>    | 316 (4.0%)   | 122 (38.6%) | 0.90   | 128 (12.8%) | 0.46    |
| <b>Heme+Neuro+Renal</b>   | 497 (6.3%)   | 140 (28.2%) | 0.84   | 178 (17.8%) | 0.57    |
| <b>Heme+Neuro+Resp</b>    | 817 (10.3%)  | 191 (23.4%) | 0.62   | 298 (29.7%) | 0.14    |
| <b>Heme+Renal+Resp</b>    | 481 (6.1%)   | 146 (30.4%) | 0.19   | 174 (17.4%) | 0.05    |
| <b>Immuno+Liver+Neuro</b> | 257 (3.3%)   | 78 (30.4%)  | 0.58   | 105 (10.5%) | <0.001* |
| <b>Immuno+Liver+Renal</b> | 196 (2.5%)   | 64 (32.7%)  | 0.57   | 83 (8.3%)   | 0.06    |
| <b>Immuno+Liver+Resp</b>  | 226 (2.9%)   | 76 (33.6%)  | 0.32   | 103 (10.3%) | 0.001*  |
| <b>Immuno+Neuro+Renal</b> | 517 (6.5%)   | 103 (19.9%) | 0.10   | 179 (17.9%) | 0.80    |
| <b>Immuno+Neuro+Resp</b>  | 943 (11.9%)  | 162 (17.2%) | 0.25   | 299 (29.8%) | 0.90    |
| <b>Immuno+Renal+Resp</b>  | 484 (6.1%)   | 110 (22.7%) | 0.03   | 176 (17.6%) | 0.56    |
| <b>Liver+Neuro+Renal</b>  | 274 (3.5%)   | 107 (39.1%) | 0.18   | 101 (10.1%) | 0.80    |
| <b>Liver+Neuro+Resp</b>   | 362 (4.6%)   | 141 (39.0%) | 0.44   | 133 (13.3%) | <0.001* |

Supplementary Material

|                         |            |             |      |             |      |
|-------------------------|------------|-------------|------|-------------|------|
| <b>Liver+Renal+Resp</b> | 256 (3.2%) | 105 (41.0%) | 0.05 | 102 (10.2%) | 0.64 |
| <b>Neuro+Renal+Resp</b> | 721 (9.1%) | 170 (23.6%) | 0.94 | 236 (23.6%) | 0.17 |

\*p<0.005 considered statistically significant.

*Coag*: coagulation

*CV*: cardiovascular

*Endo*: endocrinologic

*Immuno*: immunologic

*Heme*: hematologic

*Neuro*: neurologic

*Resp*: respiratory

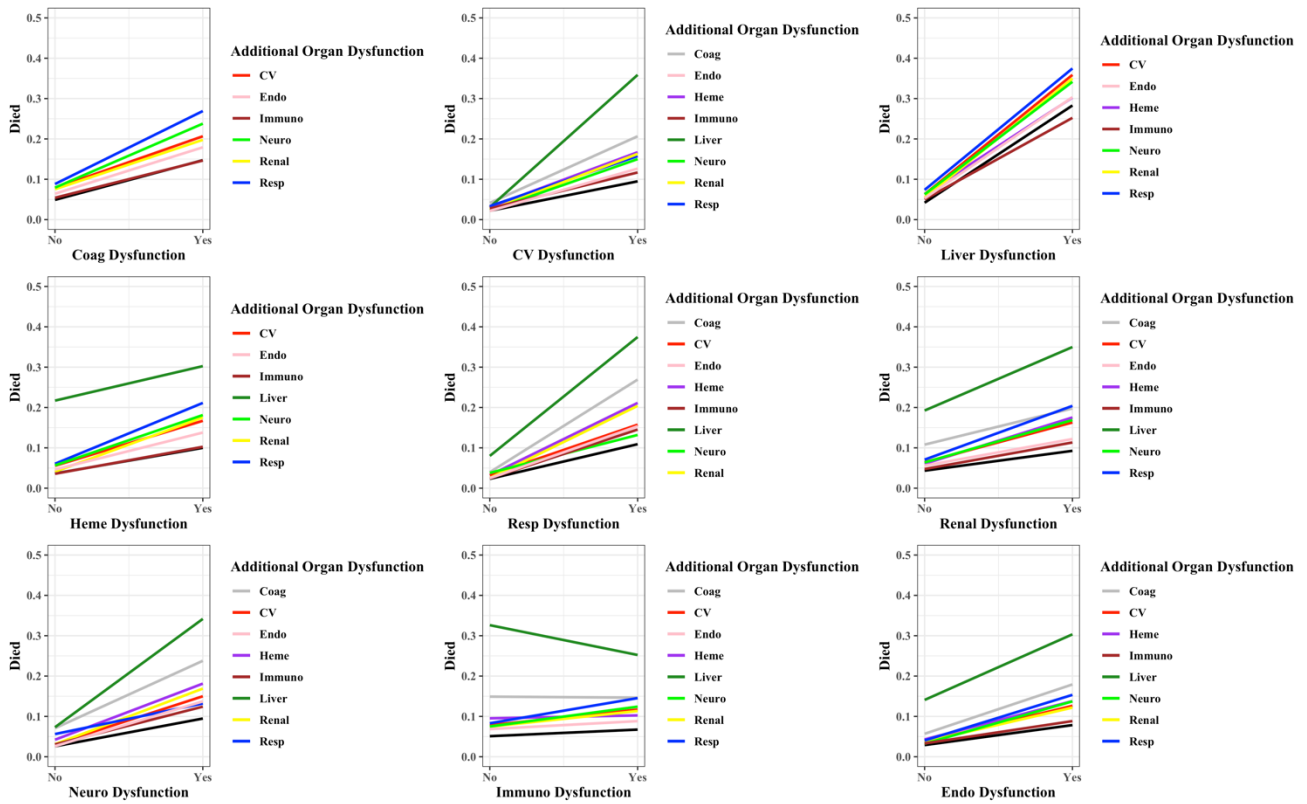

**Supplementary Figure 1.** Interaction plots for two organ dysfunctions and association with mortality. Black line represents single organ dysfunction, colored lines (per legend) represent interaction with second organ dysfunction. *Coag*: coagulation; *CV*: cardiovascular; *Endo*: endocrinologic; *Immuno*: immunologic; *Heme*: hematologic; *Neuro*: neurologic; *Resp*: respiratory

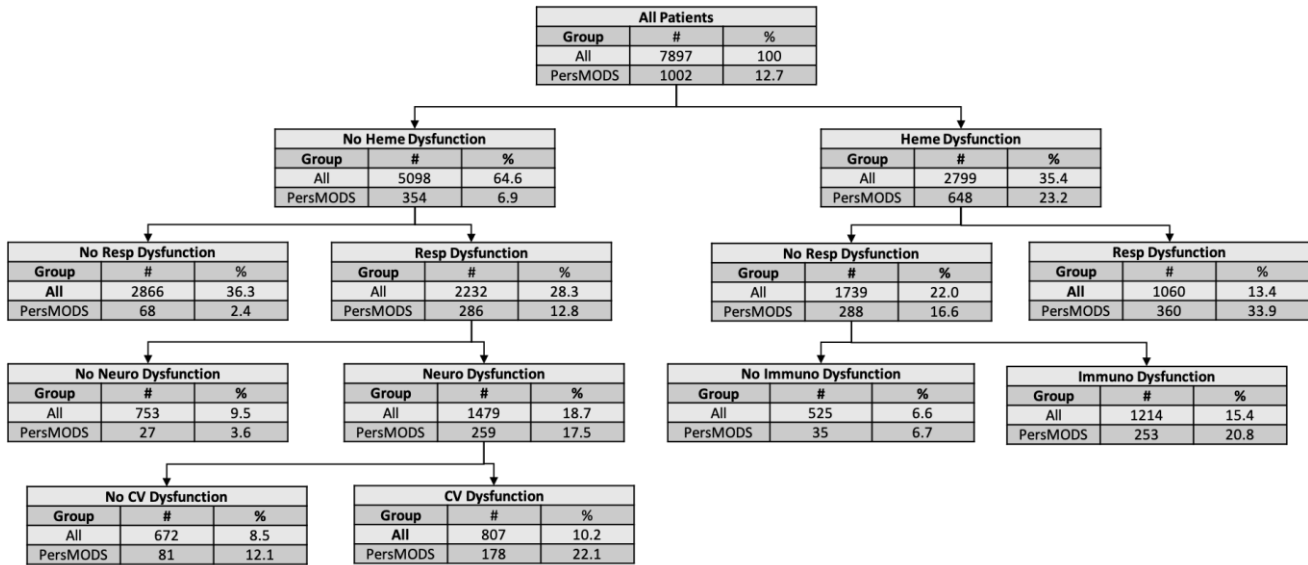

**Supplementary Figure 2.** Classification Tree for Persistent MODS using 10-fold cross validation. The top node of the decision tree, the root node, shows the total number of subjects in the cohort and the number and proportion of non-survivors. Each subsequent node shows the criterion for subsequent decisions, along with the number and proportion of patients with or without the organ dysfunction and the proportion who died. Terminal nodes show the risk for an individual with the preceding organ dysfunctions. AUROC = 0.74 (95% CI 0.70-0.78). *Coag*: coagulation; *CV*: cardiovascular; *Endo*: endocrinologic; *Immuno*: immunologic; *Heme*: hematologic; *Neuro*: neurologic; *Resp*: respiratory
